# Supplementary material
Source: HighWire-hosted journal article supplement (https://jnis.bmj.com/content/10/6/571)
Supplement: inline-supplementary-material-1 [file inline-supplementary-material-1.docx]

**Table I: Patient characteristics**

| **Sex - n (%)** | **female** | 210 (64.4) |
| --- | --- | --- |
|  | **male** | 116 (35.6) |
| **Age (mean ± SD)** | | 50.0 ± 12.6 |
| **Patients with multiple aneurysms - n (%)** | | 38 (11.7) |
| **Patients with 1 embolized aneurysm - n (%)** | | 288 (88.3) |
| **Patients with 2 embolized aneurysms - n (%)** | | 17 (5.2) |
| **Patients with 3 embolized aneurysms - n (%)** | | 1 (0.3) |

**Table II: Aneurysm characteristics and growth dynamics by localization**

|  | **Total** | **ICA** | **Acom** | **MCA** | **Pcom** | **PICA** | **BA tip** | **BA trunc** | **ACA** |
| --- | --- | --- | --- | --- | --- | --- | --- | --- | --- |
| **No. of aneurysms** | 345 | 65 | 104 | 76 | 47 | 14 | 26 | 3 | 10 |
| **No. of aneurysms with total occlusion on first follow-up** | 218 | 36 | 80 | 46 | 29 | 8 | 10 | 2 | 7 |
| **No. of coils - mean** | 4.5 | 5.3 | 4.1 | 4.5 | 3.8 | 4.2 | 5.4 | 6 | 4.9 |
| **Stent assisted - n** | 25 | 12 | 4 | 2 | 0 | 2 | 4 | 0 | 1 |
| **Balloon - n** | 56 | 17 | 8 | 15 | 6 | 1 | 7 | 0 | 2 |
| **Greatest diameter - mm mean** | 5.3 | 6.5 | 4.7 | 4.9 | 5 | 5.1 | 6.2 | 7.3 | 6.6 |
| **Subarachnoid hemorrhage - n** | 234 | 33 | 83 | 51 | 33 | 10 | 16 | 2 | 6 |
| **Total length of coils - cm mean** | 50.7 | 73.3 | 37.0 | 47 | 40.6 | 36.0 | 71.0 | 61.2 | 80.9 |
| **Greatest residual volume during follow-up - mL mean** | 29.6 | 45.1 | 15.1 | 27.9 | 17.6 | 24.9 | 76.4 | 19.1 | 36.8 |
| **Aneurysms remaining totally occluded - n** | 207 | 30 | 77 | 45 | 29 | 8 | 10 | 2 | 6 |
| **Aneurysms with residual flow - n** | 138 | 35 | 27 | 31 | 18 | 6 | 16 | 1 | 4 |
| **Increase of >10 mm³ from first to last MRA - n** | 74 | 18 | 16 | 14 | 7 | 3 | 14 | 0 | 2 |
| **Decrease of >10 mm³ from first to last MRA - n** | 16 | 3 | 6 | 4 | 2 | 0 | 1 | 0 | 0 |
| **Growth category** |  |  |  |  |  |  |  |  |  |
| **Steep decrease - n** | 2 | 1 | 0 | 1 | 0 | 0 | 0 | 0 | 0 |
| **Steady decrease - n** | 25 | 5 | 6 | 6 | 4 | 2 | 1 | 1 | 0 |
| **Stable - n** | 214 | 31 | 78 | 48 | 30 | 8 | 10 | 2 | 7 |
| **Steady increase - n** | 83 | 22 | 17 | 18 | 12 | 2 | 10 | 0 | 2 |
| **Steep increase - n** | 21 | 6 | 3 | 3 | 1 | 2 | 5 | 0 | 1 |
| **Increase later than 48 months  [of N=198 aneurysms with follow-up ≥48 months] - n** | 53 | 9 | 12 | 16 | 6 | 2 | 7 | 0 | 1 |
| **Phase with decrease and later increase - n** | 22 | 2 | 6 | 8 | 2 | 1 | 3 | 0 | 0 |
| ICA = internal carotid artery, Acom = anterior communicating artery, MCA = middle cerebral artery, Pcom = posterior communicating arteries, PICA = posterior inferior cerebellar artery, BA = basilar artery, ACA = anterior cerebral artery | | | | | | | | | |

**Table III Predicting factors of increase of residual flow in embolized aneurysms**

| **Prognostic factor** | **Level** | **Logistic regression model** | | | |
| --- | --- | --- | --- | --- | --- |
| **OR** | **95% CI** | **p value** | |
| **Sex** | female | 1.00 | - | 0.253 | |
| male | 0.63 | [0.29, 1.38] |
| **Age** | (per 10 years) | 1.23 | [0.93, 1.63] | 0.141 | |
| **Greatest diameter of aneurysm** | (per 1 mm) | 1.50 | [1.17, 1.93] | 0.002 | |
| **Subarachnoid hemorrhage** | no | 1.00 | - | 0.060 | |
| yes | 2.10 | [0.97, 4.53] |
| **Localization** | Acom | 1.16 | [0.40, 3.33] | 0.371 | 0.789 |
| ACA | 1.61 | [0.12, 21.39] | 0.718 |
| Pcom/ICA | 1.51 | [0.56, 4.03] | 0.415 |
| MCA | 1.00 | - | - |
| Posterior | 0.50 | [0.08, 2.97] | 0.445 |
| Basilaristip | 2.76 | [0.91, 8.40] | 0.073 |
| **Total length** | (per 10 cm) | 0.89 | [0.82, 0.97] | 0.006 | |
| **Multiple aneurysms** | no | 1.00 | - | 0.086 | |
| yes | 2.00 | [0.91, 4.42] |
| **Complete occlusion on initial follow-up scan** | no | 1.00 | - | 0.000 | |
| yes | 0.02 | [0.01, 0.04] |
| **Balloon assisted treatment** | no | 1.00 | - | 0.430 | |
| yes | 1.44 | [0.58, 3.53] |
| ACA = anterior cerebral artery, Acom = anterior communicating artery, MCA = middle cerebral artery, Pcom/ICA = posterior communicating arteries and internal carotid artery, Posterior = vertebral artery, posterior inferior cerebellar artery, superior cerebellar artery, basilar artery | | | | | |
